# Supplementary material for: Modelling of Hydrophilic Interaction Liquid Chromatography Stationary Phases Using Chemometric Approaches
Source: PubMed Central journal article supplement (PMC5746734; doi:10.3390/metabo7040054), 2017-10-24
Supplement: metabolites-07-00054-s001.pdf [file metabolites-07-00054-s001.pdf]

# Supplementary Information: Modeling of hydrophilic interaction liquid chromatography stationary phases using chemometric approaches

Meritxell Navarro-Reig <sup>1</sup>, Elena Ortiz-Villanueva <sup>1</sup>, Romà Tauler <sup>1</sup> and Joaquim Jaumot <sup>1,\*</sup>

<sup>1</sup> Department of Environmental Chemistry, IDAEA-CSIC, Jordi Girona 18-26, 08034 Barcelona, Spain

\* Correspondence: joaquim.jaumot@idaea.csic.es; Tel.: +34934006100-1443

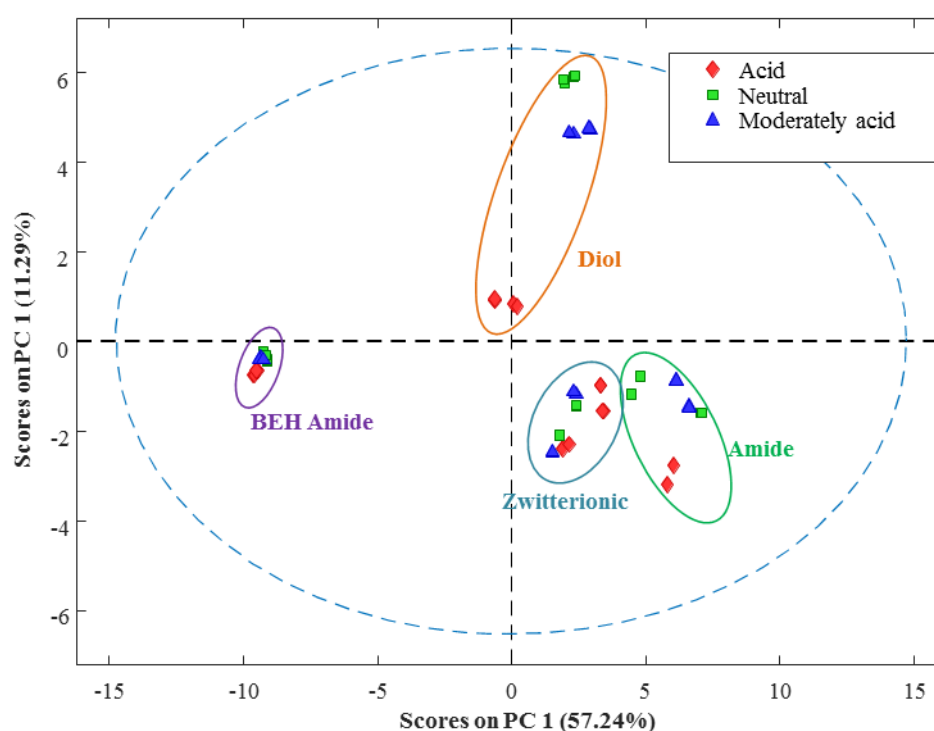

**Figure S1.** PCA scores plot of samples classified according to the pH of the mobile phase.

**Table S1.** Metabolites' logP values obtained from PCLIENT software.

| Metabolites          | logP   |
|----------------------|--------|
| <b>Nucleosides</b>   |        |
| 1-methyladenosine    | -0.054 |
| 2''-O-methylcytidine | -0.872 |
| 2-thiocytidine       | -0.427 |
| 5-methylcytidine     | -0.872 |
| cytidine             | -1.176 |
| guanosine            | -0.808 |
| inosine              | -0.752 |

|               |        |
|---------------|--------|
| pseudouridine | -1.988 |
| ribothymidine | -1.278 |
| uridine       | -1.582 |

---

**Amino Acids**

---

|                          |        |
|--------------------------|--------|
| 1-methyl-L-histidine     | -2.704 |
| 3-methyl-L-histidine     | -2.704 |
| 4-hydroxy-L-proline      | -1.04  |
| 5-hydroxylysine          | -3.273 |
| $\beta$ -alanine         | -2.918 |
| creatinine               | -0.339 |
| cysteine                 | -5.555 |
| L(-)-proline             | -0.232 |
| L(+)-arginine            | -2.934 |
| L(+)-cystathionine       | -5.202 |
| L(+)-lysine              | -2.485 |
| L-2-aminoadipic acid     | -2.568 |
| L-2-amino-n-butyric acid | -2.465 |
| L-alanine                | -2.918 |
| L-anserine               | -0.75  |
| L-carnosine              | -1.054 |
| L-citrulline             | -3.34  |
| L-glutamic acid          | -2.946 |
| L-histidine              | -3.057 |
| L-homocystine            | -4.869 |
| L-isoleucine             | -1.677 |
| L-leucine                | -1.677 |
| L-methionine             | -2.055 |
| L-ornithine              | -2.863 |
| L-serine                 | -3.726 |
| L-threonine              | -3.272 |
| L-tryptophan             | -1.267 |
| L-valine                 | -2.055 |
| taurine                  | -1.731 |
| sarcosine                | -0.703 |
| L-aspartic acid          | -3.356 |

---

**Sugars**

---

|             |        |
|-------------|--------|
| D(-)-ribose | -2.089 |
| glucose     | -2.483 |
| trehalose   | -3.898 |
| mannitol    | -2.497 |

---

**Organic acids**

---

|                   |        |
|-------------------|--------|
| citric acid       | -1.169 |
| ketoglutaric acid | -0.828 |
| pimelic acid      | 0.787  |
| succinic acid     | -0.353 |

|               |        |
|---------------|--------|
| creatine      | -0.735 |
| <hr/>         |        |
| <b>Others</b> |        |
| hypoxanthine  | 0.582  |
| L-carnitine   | -3.601 |
| serotonin     | 1.006  |
| tryptamine    | 1.574  |
| <hr/>         |        |
